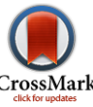

# Differential Effect of Culture Temperature and Specific Growth Rate on CHO Cell Behavior in Chemostat Culture

Mauricio Vergara<sup>1</sup>, Silvana Becerra<sup>1,2</sup>, Julio Berríos<sup>1</sup>, Nelson Osses<sup>3</sup>, Juan Reyes<sup>3</sup>, María Rodríguez-Moyá<sup>4</sup>, Ramon Gonzalez<sup>4,5</sup>, Claudia Altamirano<sup>1,2\*</sup>

**1** School of Biochemical Engineering, Pontificia Universidad Católica de Valparaíso, Valparaíso, Chile, **2** CREAS CONICYT-REGIONAL, GORE Valparaíso, Valparaíso, Chile, **3** Institute of Chemistry, Pontificia Universidad Católica de Valparaíso, Valparaíso, Chile, **4** Department of Chemical and Biomolecular Engineering, Rice University, Houston, Texas, United States of America, **5** Department of Bioengineering, Rice University, Houston, Texas, United States of America

## Abstract

Mild hypothermia condition in mammalian cell culture technology has been one of the main focuses of research for the development of breeding strategies to maximize productivity of these production systems. Despite the large number of studies that show positive effects of mild hypothermia on specific productivity of r-proteins, no experimental approach has addressed the indirect effect of lower temperatures on specific cell growth rate, nor how this condition possibly affects less specific productivity of r-proteins. To separately analyze the effects of mild hypothermia and specific growth rate on CHO cell metabolism and recombinant human tissue plasminogen activator productivity as a model system, high dilution rate ( $0.017 \text{ h}^{-1}$ ) and low dilution rate ( $0.012 \text{ h}^{-1}$ ) at two cultivation temperatures (37 and 33°C) were evaluated using chemostat culture. The results showed a positive effect on the specific productivity of r-protein with decreasing specific growth rate at 33°C. Differential effect was achieved by mild hypothermia on the specific productivity of r-protein, contrary to the evidence reported in batch culture. Interestingly, reduction of metabolism could not be associated with a decrease in culture temperature, but rather with a decrease in specific growth rate.

**Citation:** Vergara M, Becerra S, Berríos J, Osses N, Reyes J, et al. (2014) Differential Effect of Culture Temperature and Specific Growth Rate on CHO Cell Behavior in Chemostat Culture. PLoS ONE 9(4): e93865. doi:10.1371/journal.pone.0093865

**Editor:** Jacques Emile Dumont, Université Libre de Bruxelles (ULB), Belgium

**Received:** January 3, 2014; **Accepted:** March 4, 2014; **Published:** April 3, 2014

**Copyright:** © 2014 Vergara et al. This is an open-access article distributed under the terms of the Creative Commons Attribution License, which permits unrestricted use, distribution, and reproduction in any medium, provided the original author and source are credited.

**Funding:** This work was supported by FONDECYT 1120667, VRIEA-Pontificia Universidad Católica de Valparaíso, and by CONICYT Doctoral scholarship to MV and SB. The funders had no role in study design, data collection and analysis, decision to publish, or preparation of the manuscript.

**Competing Interests:** The authors have declared that no competing interests exist.

\* E-mail: claudia.altamirano@ucv.cl

## Introduction

The market of biopharmaceutical products and drugs based on recombinant proteins (r-proteins) is growing rapidly, with total sales reaching more than 138 billion dollars in 2010 [1]. The mammalian cell culture system is predominant in the synthesis of biopharmaceutical products due to their ability to properly develop processes for assembly, folding and post-translational modifications, such as glycosylation [2].

While in the past 20 years production systems have improved in terms of cell growth, from maximum cell concentrations of 1–2 to 10–15 million cells/ml, as well as in specific (10–20 to 50–90 pg/cell/day) and volumetric (0.05–0.1 to 1–5 g/L) productivities [3], the demand for this growing market still requires further production capacity under stringent optimization schemes [4]. In this aspect, considering that the productivity of r-proteins is directly proportional to the mass of viable cells, culture viability and longevity, different approaches have been investigated to optimize the production capacity of the cultures. One of such approaches has been the use of mild hypothermia condition with temperatures ranging between 30°C and 33°C, which have been shown to increase culture longevity and specific productivity of a wide range of recombinant proteins, in addition to reducing cell growth rate in CHO cells batch cultures [5,6,7,8,9,10,11,12,13,14].

The mechanism for an increase in specific productivity of recombinant proteins from a decrease in cultivation temperature in batch cultures has not been determined with certainty [15]. Among the possible causes that could be involved in this phenomenon are: cell cycle arrest in G1 phase, considered as a more metabolically active phase [16,8,17,18,13]; reduced or delayed catabolism of carbon and energy sources [19,20]; increased levels of transcription and increased mRNA stability of r-proteins [21,8,10,22]; increase in folding capacity and expression of endoplasmic reticulum chaperones [23,24,25].

While the benefits of mild hypothermia condition have been widely demonstrated by cold shock [5,13,20] or after adaptation of the cells [14;26], a significant increase in specific productivity of r-proteins has been observed in most cases, all existing reports have used batch cultivation [27,7,19,10,28,9,29,30,31,14]. Unfortunately, this mode of cultivation does not allow to study the effect of reduced culture temperatures on r-protein productivity separately, since a reduction of the specific growth rate is simultaneously caused by mild hypothermia. In this sense, chemostat culture resurgence as the most appropriate tool for obtaining biologically reliable and homogeneous data [32,33,34,35] (based on the advantages offered through environmental control, reproducibility and delivering constant physicochemical conditions), allowing control the specific growth rate of the cells ( $\mu$ ), through the dilution rate (D), after reaching steady state (SS) being valid in mammalian cell technology to high viability ( $D = \mu$ ). Thus, chemostat culture

emerges as a relevant option to achieve a correct understanding of the cell behavior to solve the problem of evaluating various culture variables [36].

Therefore, the use of chemostat cultures is a more suitable option to study the sole effect of temperature changes, as it allows defining the specific growth rate by setting the dilution rate ( $D = F/V$ ), ( $F$ : Feed flow;  $V$ : Reaction volume). This constant and stable environment, in turn, allows separating the specific growth rate from other system variables, therefore maintaining the cell population in a defined physiological state [37].

This study aims to separately assess the effect of mild hypothermia and specific growth rate on the production of recombinant human tissue plasminogen activation (rht-PA) produced by CHO cells. For this purpose, chemostat cultures were carried out at two  $D$  (0.017 and 0.012  $\text{h}^{-1}$ ) and two culture temperatures (37°C and 33°C).

## Materials and Methods

### Cell line and culture medium

The ht-PA producing cell line (CHO TF 70R) was obtained from Pharmacia & Upjohn S.A. (Sweden) (kind gift of Torsten Björli). The culture medium was SFM4CHO HyClone, free of glucose and glutamine, supplemented with 10 mM glucose (G7021, Sigma, USA) and 6 mM glutamate (G8415, Sigma, USA) used in substitution of glutamine [38] in the feed.

### Chemostat cultures

Chemostat culture experiments were performed in a Biostat A Plus bioreactor (Sartorius Stedim Biotech S.A., France) maintaining a working volume of 500 ml and a pH level of 6.9 (Hepes buffer, Sigma-Aldrich). The bioreactor was inoculated and operated in batch-mode during 48 h and it was then supplied with sterile feed throughout the period of operation.

A series of four experiments was performed, in duplicate, at 37°C or 33°C, keeping a High- $D$ : 0.017  $\text{h}^{-1}$  (Residence time ( $\tau = 1/D$ ),  $\tau_{0.017}$ : 58.8 h) or Low- $D$ : 0.012  $\text{h}^{-1}$  ( $\tau_{0.012}$ : 83.3 h). Samples were taken every 24 h for viable cell quantification, centrifuged and the supernatant was immediately frozen at  $-20^\circ\text{C}$  for analytic measurements. Cultures were considered to reach steady-state (SS) when, after at least four residence times,  $4 \times \tau_{0.017}$ : 235.2 h or  $4 \times \tau_{0.012}$ : 333.2 h, and the number of viable cells, glucose, and lactate concentration, were constant in two consecutive samples [33].

### Analytical methods

Cells were counted using a hemacytometer (Neubauer, Germany). Cell viability was determined by the method of exclusion using trypan blue (T8154, Sigma, USA) (1:1 mixture of 0.2% trypan blue in saline and cell sample). Glucose and lactate concentrations were determined with an automatic biochemistry analyzer (YSI 2700, Yellow Springs Inc., USA). The concentration of rht-PA was quantified by enzyme immunoassay (Biopool Imulysse t-PA kit, Diagnostic International, Germany).

### Quantitative real-time PCR assay

RNA extraction and cDNA synthesis were performed as previously described [39]. Cells were harvested by centrifugation at 500 g for 10 min at 4°C and stored at  $-80^\circ\text{C}$  with RNAlate solution (RNA stabilization and protection solution). Total RNA was isolated and purified from the samples using the High Pure RNA Isolation kit (Roche Applied Science), and the concentration of RNA was determined by measuring the ratio of absorbance at 260 and 280 nm. The synthesis of cDNA was carried out using

RevertAi H First Strand cDNA Synthesis kit (Fermentas Inc.) using random DNA primers according to the manufacturer's protocol. Quantitative real-time PCR (qPCR) was performed using LightCycler FastStart DNA Master SYBR Green I systems (Roche Applied Science). The sequences of the primers used for cDNA synthesis and for qPCR were designed using algorithm Primer 3 (Table 1). The level of *cdc42* mRNA was used as an internal control [40] to normalize the results obtained for the *rht-PA* mRNA. The relative quantification of gene expression was performed as described previously [39] using the standard curve method with three measurements for each gene for each experimental condition evaluated. A maximum standard deviation (SD) of 10% was obtained.

### Estimation of specific rates at Steady-State

Specific growth rate ( $\mu$ ) was calculated from a mass balance in the reactor:

$$\mu = D \frac{(N_v + N_d)}{N_v} = D \frac{N_t}{N_v} \quad (\text{Ec1})$$

where  $N_v$  is the concentration of viable cells ( $10^6/\text{ml}$ ),  $N_d$  is the concentration of dead cells ( $10^6/\text{ml}$ ),  $N_t$  is the concentration of total cells, and  $D$  is the dilution rate of the culture ( $\text{h}^{-1}$ ).

Specific rates of production or consumption (Ec2.) of metabolite  $i$  ( $q_i$ ) were calculated from a mass balance in the reactor:

$$q_i = D \frac{(C_i^i - C_i^o)}{N_v} \times 10^9 \quad (\text{Ec2})$$

where  $C_i^i$  is the concentration of  $i$  in the inlet (mmol/L),  $C_i^o$  is the concentration of  $i$  in the outlet (mmol/L),  $N_v$  is the concentration of viable cells ( $10^6/\text{ml}$ ), and  $D$  is the dilution rate of the culture ( $\text{h}^{-1}$ ).

### Statistical Analysis

Chemostat cultures at each condition were performed in duplicate and two independent samples were taken at each time point for every culture with analytical measurements carried out separately. Values are expressed as mean standard error. Analysis of variance for factorial design of two factors was used to compare the results by Design-Expert 7 for Windows.

## Results and Discussion

### Effect of mild hypothermia and specific growth rate on cell growth

Separate temperature reduction and specific growth rate effects were investigated in chemostat culture, once a steady state was reached (after 4 residence times). The main results are presented in Figure 1. The maximum cell density achieved in the cultures grown at High- $D$  ( $D = 0.017 \text{ h}^{-1}$ ) was  $2 \times 10^6 \text{ cells/ml} \pm 0.1$ , without any observed effects on temperature. In cultures grown

**Table 1.** Primers used in qPCR analysis.

| Gene          | Forward (5' → 3')    | Reverse (5' → 3')   |
|---------------|----------------------|---------------------|
| <i>cdc42</i>  | CCTCACAGAAAGCCTAAA   | TGGGGTTCGTGCTGTGTAA |
| <i>rht-PA</i> | GCCCTGGTGCTACGTCTTTA | AACACCAGCTGTGCAGAAC |

doi:10.1371/journal.pone.0093865.t001

at Low-D ( $D=0.012\text{ h}^{-1}$ ) cell concentration was slightly lower, reaching a peak of  $1.8 \times 10^6\text{ cells/ml} \pm 0.2$  at  $37^\circ\text{C}$  and  $1.6 \times 10^6\text{ cells/ml} \pm 0.1$  at  $33^\circ\text{C}$ . Thus, a reduction by 20% is observed in cell density between the cultures carried out at  $33^\circ\text{C}$ . Regarding the cell viability (see Figure 1b) just at  $33^\circ\text{C}$  and Low-D, a slight decrease was observed, keeping all the other cultures at 97%.

These results are consistent with those reported in literature, where at the same dilution rate ranges, it has been observed a steady concentration of viable cells, both CHO [41] as hybridoma cells [42] at  $37^\circ\text{C}$  as cultivation temperature. However, the observed behavior at  $33^\circ\text{C}$ , where a decrease in the number of viable cells is observed, has been reported only in chemostat culture at  $37^\circ\text{C}$  and low dilution rate, close to  $0.010\text{ h}^{-1}$  [41,43,44], associated with a higher rate of cell death in the G1

phase of the cell cycle, which predominate at low dilution rates [45,46].

To date, no other studies employing chemostat culture have evaluated the effect of temperature on the number of viable cells. The response observed at High-D contradicts the idea that the hypothermia condition by itself affects cell concentration in batch cultures [8,19,10,14], since no change in a viable cell number could be observed at High-D, due to different culture temperature.

### Effect of mild hypothermia and specific growth rate on production of rht-PA

rht-PA protein production was evaluated under High-D and Low-D at two culture temperatures ( $37$  and  $33^\circ\text{C}$ ) (Figure 1c). Interestingly, reducing dilution rate at  $37^\circ\text{C}$  not produce differences in  $q_{\text{rht-PA}}$  (Figure 2). However, at  $33^\circ\text{C}$  an increase of 65% in  $q_{\text{rht-PA}}$  was observed by reducing the dilution rate. Meanwhile, the temperature reduction at High-D promoted a decrease in  $q_{\text{rht-PA}}$ , whereas at Low-D there were no significant differences in  $q_{\text{rht-PA}}$  at both temperatures tested. These results indicate that at low specific growth rates, the use of mild hypothermia conditions influence the productivity of the recombinant protein positively. In this study the condition of Low-D could represent a turning point in relation to the effect of temperature and it requires studies at even lower dilution rates to corroborate this hypothesis. On the other hand, at Low-D levels of mRNA of rht-PA show a significant increase for both temperatures evaluated (Figure 2b). This increase in the level of mRNA only resulted in an increase in  $q_{\text{rht-PA}}$  at  $33^\circ\text{C}$ , without observing any increase in this parameter at  $37^\circ\text{C}$ .

In concordance with reported by Kou and colleagues (2011) [47], it may be presumed that post-translational processes are

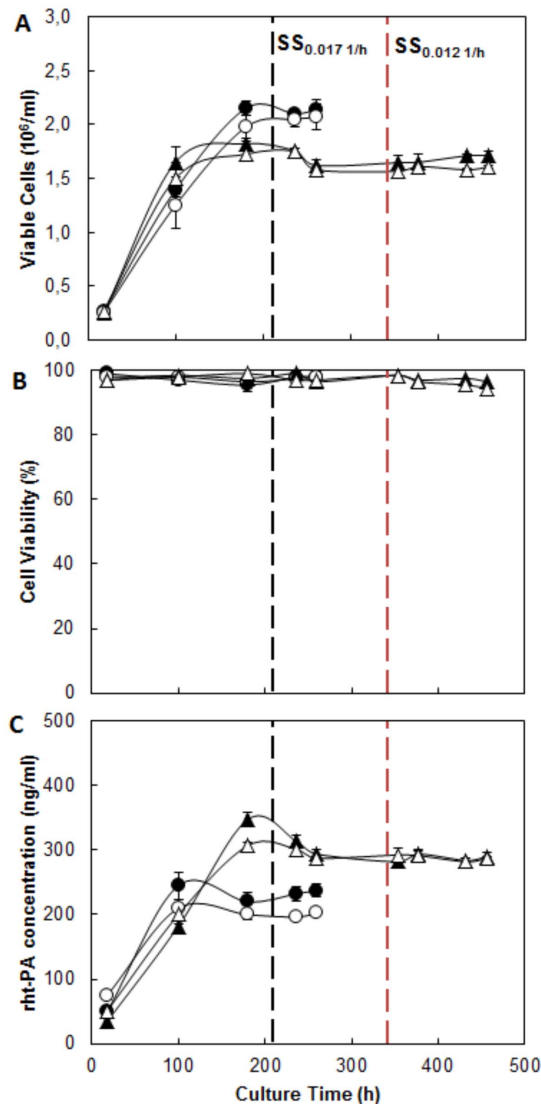

**Figure 1. Profile of CHO cells growing, viability and rht-PA production at different culture temperatures and dilution rates.** A: Viable cell concentration. B: Viability percentage. C: rht-PA concentration. ● Condition  $37^\circ\text{C}$  and  $0.017\text{ h}^{-1}$ ; ○ Condition  $33^\circ\text{C}$  and  $0.017\text{ h}^{-1}$ ; ▲ Condition  $37^\circ\text{C}$  and  $0.012\text{ h}^{-1}$ ; △ Condition  $33^\circ\text{C}$  and  $0.012\text{ h}^{-1}$ . Black dotted line: Start of SS  $0.017\text{ h}^{-1}$ . Red dotted line: Start of SS  $0.012\text{ h}^{-1}$ .

doi:10.1371/journal.pone.0093865.g001

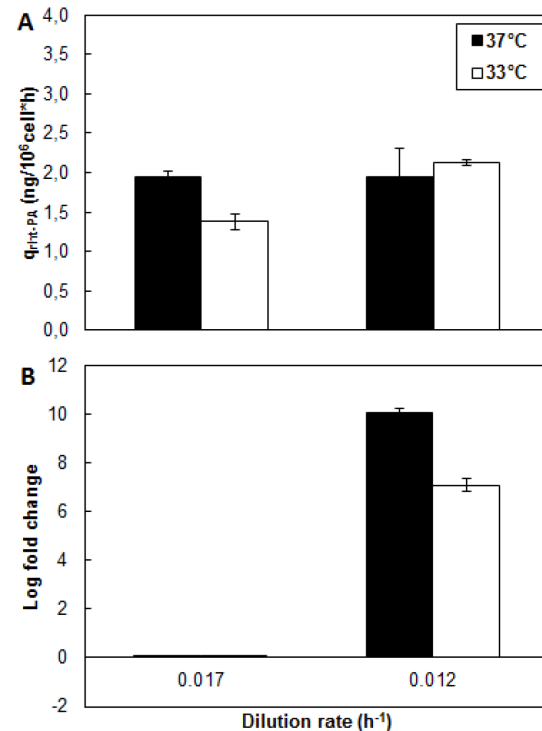

**Figure 2. Differential effect of culture temperature and dilution rate on protein production and mRNA expression of rht-PA.** A: Specific productivity of rht-PA. B: Log fold change of mRNA of rht-PA. ■ Condition  $37^\circ\text{C}$ ; □ Condition  $33^\circ\text{C}$ .

doi:10.1371/journal.pone.0093865.g002

improved in batch culture of CHO cells, under mild hypothermia and low specific growth rate, allowing an increase in the synthesis of the rht-PA protein.

This results regarding the effect of  $\mu$  on the productivity of r-protein at 33°C differ from those reported in chemostat cultures of CHO cell at 37°C [41], in which it was reported that a higher specific growth rate is associated with an increased specific productivity of r-protein. However, it's agree with that reported by Berrios et al. (2009) who shows a correlation between increasing  $q_{\text{rht-PA}}$  and decreasing  $\mu$  promoted by low temperature or varying concentrations of mannose in batch culture. The relationship between specific growth rate and specific productivity is suggested to be dependent on the cell line used, the r-protein studied, as seen in the case of hybridoma culture [43,44,42], the limiting nutrient of culture, and also depend on culture temperature used.

Furthermore, the null of mild hypothermia effect on  $q_{\text{rht-PA}}$  in chemostat cultures at Low-D is opposite to the widely reported positive effect in batch cultures [6,8,19,12,20,27,9,48,30,14,31]. Meanwhile, in the condition of High-D a negative effect of mild hypothermia on  $q_{\text{rht-PA}}$  is observed. While these results have no precedents to be contrasted, at less in chemostat culture, overall, they suggest that the reported effect of mild hypothermia promoting specific productivity of r-proteins in batch CHO cell cultures, not only corresponds to the result of lowering the culture temperature, but rather is the combined effect of a temperature reduction and a reduction of cellular growth rate. Some reports suggest that a number of key regulatory proteins and pathways are involved in modulating the response of cells to mild hypothermia, such as cold shock proteins, but these were no the objective of this work.

### Effect of mild hypothermia and specific growth rate on Central Metabolism

Glucose, lactate and glutamate metabolism was investigated under two different cultivation temperatures and High-D and Low-D. The Glucose profile (Figure 3a) shows insignificant differences in the levels of residual glucose in the bioreactor, due to the reduction of culture temperature or dilution rate, in all cases, concentrations were less than 0.2 mM. Similarly, the specific glucose consumption was not affected by the temperature reduction (Figure 4a).

The use of High-D or Low-D caused no effect on the specific glucose consumption. This response differs from that reported in the literature, where a reduction in dilution rate is accompanied by a significant decrease in residual glucose levels and specific glucose consumption in CHO [41] and other cell lines [44,42,32]. The response obtained in this study could be explained by a redistribution of carbon fluxes for biomass and the lactate production [38]. Indeed, although the supplied glucose is capable of supporting the growth of cells and the production of recombinant protein due to the growth conditions, it is fully used and the effect of varying the dilution rate is reflected in the decreased specific lactate production. (see below).

The absence of an effect from mild hypothermia is also in contrast with what has been widely observed in batch cultures [19,20,13,14], in which a general reduction in hexose consumption, used as carbon source, has been observed. However, this evidence could arise in batch cultures from the combined effects of temperature and growth rate, produced by the reduction in temperature.

The lactate concentration profile (Figure 3b) showed differences in the levels reached, it recorded a 35% increase in lactate production at High-D that Low-D. This difference is also reflected in the increased productivity of lactate at High-D, which is 42%

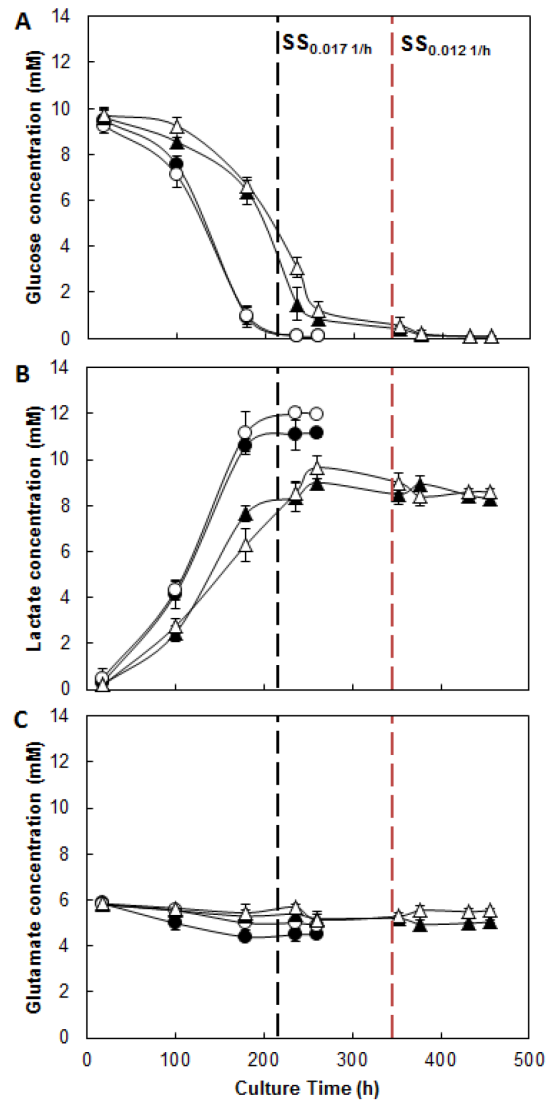

**Figure 3. Metabolic profile of CHO cells growing at different culture temperatures and dilution rates.** A: Glucose concentration. B: Lactate concentration. C: Glutamate concentration. ● Condition 37°C and 0.017 h<sup>-1</sup>; ○ Condition 33°C and 0.017 h<sup>-1</sup>; ▲ Condition 37°C and 0.012 h<sup>-1</sup>; △ Condition 33°C and 0.012 h<sup>-1</sup>. Black dotted line: Start of SS 0.017 h<sup>-1</sup>. Red dotted line: Start of SS 0.012 h<sup>-1</sup>. doi:10.1371/journal.pone.0093865.g003

larger than at Low-D (Figure 4b). No differences were observed due to the reduction of the cultivation temperature.

This behavior, resulting from the variation in dilution rate, it has been previously reported in chemostat culture of CHO cells [41] and other cell lines [44,42,32]. However, the fact that the specific lactate production were independent of the cultivation temperature differs from the behavior observed in batch cultures [19,20,13]. In these cultures, a decrease is observed in the value of the parameter, which is linked to a total reduction of cellular metabolism.

An important indicator of the metabolic state of the cells is the ratio of lactate produced to glucose consumed ( $Y_{\text{Lac/Glc}}$ ) [11,13,20]. The  $Y_{\text{Lac/Glc}}$  showed a significant decrease due to decrease in the dilution rate by 42% at 37°C and 34% at 33°C, respectively (Figure 4d). This shows a change in the metabolic fate of the carbon, also indicating a more efficient utilization of glucose

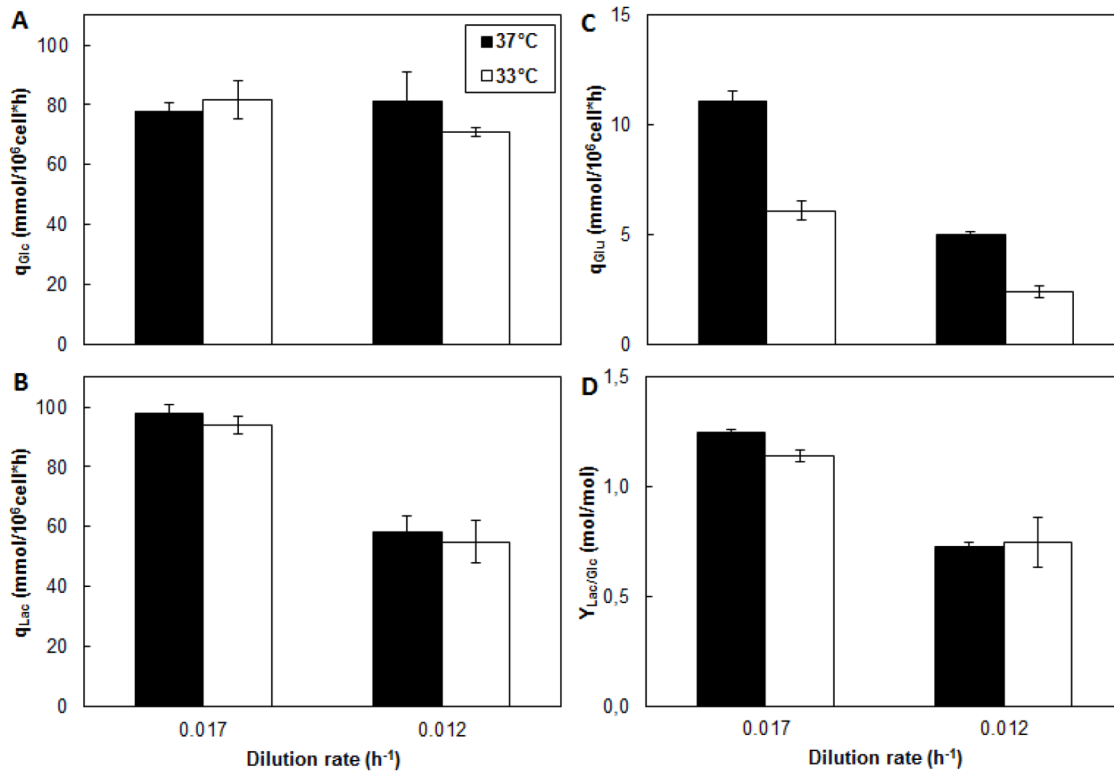

**Figure 4. Metabolic behavior of CHO cells growing at different culture temperatures and dilution rates.** A: Specific rate of glucose consumption. B: Specific rate of lactate consumption. C: Specific rate of glutamate consumption. D: Lactate yield from glucose. ■ Condition 37°C; □ Condition 33°C.

doi:10.1371/journal.pone.0093865.g004

at Low-D. These results suggest that the reduction in the  $Y_{Lac/Glc}$  in batch culture [8,20] occurs mainly due to the reduction in the cell growth and is not the result of reducing the culture temperature only.

On the other hand, the consumption profile of glutamate (Figure 3c) showed, how expected, a much lower amino acid utilization compared to glucose [33]. Interestingly, the use of this amino acid (Figure 4c) was significantly affected by the temperature reduction, showing a reduction of 42% independent of the dilution rate used. Similarly, reduction of dilution rate from High-D to Low-D caused a decrease in the  $q_{Glu}$  by 52% at 37°C and 66% at 33°C respectively.

The behavior observed, is agree with data in the literature, which indicates a decrease in the consumption of glutamine as an energy source, in CHO cells [41] and other cell lines [44,42,32] in chemostat culture as a result of the reduction in the rate of dilution. On the other hand, the effect of mild hypothermia on the consumption of amino acids used as an energy source is controversial. Yoon and colleagues reported in batch culture a reduction in the consumption of glutamine [20] as the main energy source, while others authors in the same culture system, indicate an increase in the amino acid consumption due to the reduction of the temperature of cultivation [13,8].

## Conclusion

The individual effects of mild hypothermia and specific cell growth rate were evaluated in chemostat cultures at SS. To our knowledge, this is the first report in which these variables have been studied separately. The use of mild hypothermia condition showed a differential effect on the specific productivity of rht-PA,

being negative to a condition of High-D ( $0.017 \text{ h}^{-1}$ ) and negligible to Low-D condition ( $0.012 \text{ h}^{-1}$ ). However, the decrease of D under the conditions of mild hypothermia, promotes an increase in the specific productivity of protein, suggesting that a condition of mild hypothermia and smaller values of  $\mu$  promote a greater system productivity. A comprehensive analysis of this behavior shows that the response observed in batch culture corresponds to a combined effect of both variables when using the mild hypothermia condition.

The analysis of the central metabolism revealed that at Low-D, a more efficient metabolism in glucose utilization is presented, lowering the ratio of lactate produced to glucose consumed, with no effect the reduced temperature on this parameter.

These results show that through a suitable experimental approach it is possible to evaluate the differential effect of mild hypothermia and specific growth rate on the production of r-protein in CHO cells, showing that the cellular response in the studied system is primarily modulated by changes in the specific growth rate and to a lesser extent by changes in the culture temperature. Understanding how these variables individually affect the different stages of protein synthesis, is a critical aspect, on which future efforts should be focused.

## Acknowledgments

Technical support of Veronica Figueroa is acknowledged.

## Author Contributions

Conceived and designed the experiments: MV SB JB NO JR MR RG CA. Performed the experiments: MV SB MR. Analyzed the data: MV SB JB



NO JR MR RG CA. Contributed reagents/materials/analysis tools: NO JR RG CA. Wrote the paper: MV SB JB NO JR MR RG CA.

## References

1. Visiongain Biosimilars and Follow-On Biologics (2012) Global Market Outlook 2010–2022, 142.
2. Lim Y, Wong N, Lee Y, Ku S, Wong D, et al. (2010) Engineering mammalian cells in bioprocessing – current achievements and future perspectives. *Biotechnol. Appl. Biochem.* 55: 175–189.
3. Wurm F (2004) Production of recombinant protein therapeutics in cultivated mammalian cells. *Nat. Biotechnol.* 22: 1393–1398.
4. Kim J, Kim Y, Lee G (2012) CHO cells in biotechnology for production of recombinant proteins: current state and further potential. *Appl. Microbiol. Biotechnol.* 93: 917–930.
5. Furukawa K, Ohsuye K (1998) Effect of culture temperature on a recombinant CHO cell line producing C-terminal  $\alpha$ -amidating enzyme. *Cytotechnol.* 26: 153–164.
6. Kauffmann H, Mazur X, Fussenegger M, Bailey J (1999) Influence of low temperature on productivity, proteome and protein phosphorylation of CHO cells. *Biotechnol. Bioeng.* 63: 573–582.
7. Schatz S, Kerschbaumer R, Gerstenbauer G, Kral M, Dorner F, et al. (2003) Higher expression of Fab antibody fragments in a CHO cell line at reduced temperature. *Biotechnol. Bioeng.* 84: 433–439.
8. Yoon S, Song J, Lee G (2003a) Effect of Low Culture Temperature on Specific Productivity, Transcription Level, and Heterogeneity of Erythropoietin in Chinese Hamster Ovary Cells. *Biotechnol. Bioeng.* 82: 289–298.
9. Yoon S, Kim S, Song J, Lee G (2006) Biphasic culture strategy for enhancing volumetric erythropoietin productivity of Chinese hamster ovary cells. *Enzym. Microb. Technol.* 39: 362–365.
10. Fox S, Patel U, Yap M, Wang D (2004) Maximizing interferon-gamma production by Chinese hamster ovary cells through temperature shift optimization: Experimental and modelling. *Biotechnol. Bioeng.* 85: 177–184.
11. Fogolin M, Wagner R, Etcheverrigaray M, Kratje R (2004) Impact of temperature reduction and expression of yeast pyruvate carboxylase on hGM-CSF-producing CHO cells. *J. Biotechnol.* 109: 179–191.
12. Bollati-Fogolin M, Forno G, Nimtz B, Conrath H, Etcheverrigaray M, et al. (2005) Temperature reduction in cultures of hGM-CSF-expressing CHO cells: effect on productivity and product quality. *Biotechnol. Prog.* 21: 17–21.
13. Trummer E, Fauland K, Seidinger S, Schriekl K, Lattenmayer C, et al. (2006) Process parameter shifting: Part I. Effect of DOT, pH, temperature on the performance of Epo-Fc expressing CHO cells cultivated in Controlled batch bioreactors. *Biotechnol. Bioeng.* 94: 1033–1043.
14. Berrios J, Diaz-Barrera A, Bazán C, Altamirano C (2009) Relationship between tissue plasminogen activator production and specific growth rate in Chinese hamster ovary cells cultured in mannose at low temperature. *Biotechnol. Lett.* 31: 1493–1497.
15. Becerra S, Berrios J, Osses N, Altamirano C (2012) Exploring the effect of mild hypothermia on CHO cell productivity. *Biochem. Eng. J.* 60: 1–8.
16. Carvalho A, Sá Santos S, Calado J, Haury M, Carrondo M (2003) Cell Growth Arrest by Nucleotides, Nucleosides and Bases as a Tool for Improved Production of Recombinant Proteins. *Biotechnol. Prog.* 19: 69–83.
17. Yoon S, Song J, Lee G (2003b) Effect of Low Culture Temperature on Specific Productivity and Transcription Level of Anti-4-1BB Antibody in Recombinant Chinese Hamster Ovary Cells. *Biotechnol. Prog.* 19: 1383–1386.
18. Bi J, Shuttleworth J, Al-Rubeai M (2004) Uncoupling of cell growth and proliferation results in enhancement of productivity in p21Cip1-arrested CHO cells. *Biotechnol. Bioeng.* 85: 741–749.
19. Bollati-Fogolin M, Wagner R, Etcheverrigaray M, Kratje R (2004) Impact of temperature reduction and expression of yeast pyruvate carboxylase on hGM-CSF producing CHO cells. *J. Biotechnol.* 109: 179–191.
20. Yoon S, Choi S, Song J, Lee G (2005) Effect of culture pH on erythropoietin production by Chinese hamster ovary cells grown in suspension at 32.5 and 37°C. *Biotechnol. Bioeng.* 89: 345–356.
21. Sonna L, Fujita J, Gaffin S, Lilly C (2002) Effects of heat and cold stress on mammalian gene expression. *J. Appl. Physiol.* 92: 1725–1742.
22. Al-Fageeh M, Marchant R, Carden M, Smales C (2006) The cold-shock response in cultured mammalian cells: harnessing the response for the improvement of recombinant protein production. *Biotechnol. Bioeng.* 93: 829–835.
23. Smales M, Dimnis D, Stansfield S, Alete D, Sage E, et al. (2004) Comparative proteomic analysis of GS-NS0 murine myeloma cell lines with varying recombinant monoclonal antibody production rate. *Biotechnol. Bioeng.* 88: 474–488.
24. Baik J, Lee M, An S, Yoon S, Joo E, et al. (2006) Initial Transcriptome and Proteome Analyses of Low Culture Temperature-Induced Expression in CHO Cells Producing Erythropoietin. *Biotechnol. Bioeng.* 93: 361–372.
25. Masterton R, Roobol A, Al-Fageeh M, Carden M, Smales M (2010) Post-translational events of a model reporter protein proceed with higher fidelity and accuracy upon mild hypothermic culturing of Chinese hamster ovary cells. *Biotechnol. Bioeng.* 105: 215–221.
26. Vergara M, Becerra S, Díaz-Barrera A, Berrios J, Altamirano C (2012) Simultaneous environmental manipulations in semi-perfusion cultures of CHO cells producing rh-tPA. *Electronic J. Biotechnol.* DOI: 10.2225/vol15-issue6-fulltext-2.
27. Hendrick V, Winnepenninckx P, Abdelkafi C, Vandeputte O, Cherlet M, et al. (2001) Increased productivity of recombinant tissular plasminogen activator (t-PA) by butyrate and shift of temperature: a cell cycle phases analysis. *Cytotechnol.* 36: 71–83.
28. Oguchi S, Saito H, Tsukahara T, Tsumura H (2006) pH condition in temperature shift cultivation enhances cell longevity and specific hMab productivity in CHO culture. *Cytotechnol.* 52: 199–207.
29. Shi M, Xie Z, Yu M, Shen B, Guo N (2005) Controlled growth of Chinese hamster ovary cells and high expression of antibody-IL-2 fusion proteins by temperature manipulation. *Biotechnol. Lett.* 27: 1879–1884.
30. Marchant R, Al-Fageeh M, Underhill M, Racher A, Smales M (2008) Metabolic rates, growth phase, and mRNA levels influence cell-specific antibody production levels from in vitro-cultured mammalian cells at sub-physiological temperatures. *Mol. Biotechnol.* 39: 69–77.
31. Nam J, Ermonval M, Sharfstein S (2009) The effects of microcarrier culture on recombinant CHO cells under biphasic hypothermic culture conditions. *Cytotechnol.* 59: 81–91.
32. Omasa T, Furuichi K, Iemura T, Katakura M, Suga K (2010) Enhanced antibody production following intermediate addition based on flux analysis in mammalian cell continuous culture. *Bioprocess. Biosyst. Eng.* 33: 117–125.
33. Berrios J, Altamirano C, Osses N, Gonzalez R (2011) Continuous CHO cell cultures with improved recombinant protein productivity by using mannose as carbon source: metabolic analysis and scale-up simulation. *Chem. Eng. Sci.* 66: 2431–2439.
34. Krampe B, Fagan A, Gaora P, Al-Rubeai M (2011) Chemostat-based transcriptional analysis of growth rate change and Bcl-2 over-expression in NS0 cells. *Biotechnol. Bioeng.* 108: 1603–1615.
35. Burleigh S, Van de Laar T, Stroop C, Van Grunsven W, O'Donoghue N, et al. (2011) Synergizing metabolic flux analysis and nucleotide sugar metabolism to understand the control of glycosylation of recombinant protein in CHO cells. *BMC Biotechnol.* 11: 95–112.
36. Hoskisson P, Hobbs G (2005) Continuous culture – making a comeback? *Microb.* 151: 3153–3159.
37. Bailey J, Ollis D (1986) Kinetics of Substrate Utilization, Product Formation, and Biomass Production in Cell Cultures. In: Bailey J, Ollis D, editors. *Biochemical Engineering Fundamentals 2<sup>nd</sup> edn.* McGraw-Hill, United States of America. pp. 373–454.
38. Altamirano C, Illanes A, Casablanca A, Gamez X, Cairó J, et al. (2001) Analysis of CHO Cells Metabolic Redistribution in a Glutamate-Based Defined Medium in Continuous Culture. *Biotechnol. Prog.* 17: 1032–1041.
39. Diaz-Barrera A, Soto E, Altamirano C (2012) Alginate production and *alg8* gene expression by *Azotobacter vinelandii* in continuous culture. *J. Ind. Microbiol. Biotechnol.* 39: 613–621.
40. Yee J, Gerdtzen Z, Hu W (2009) Comparative transcriptome analysis to unveil genes affecting recombinant protein productivity in mammalian cells. *Biotechnol. Bioeng.* 102: 246–263.
41. Hayter P, Curling E, Gould M, Baines A, Jenkins N, et al. (1993) The effect of the dilution rate on CHO cell physiology and recombinant interferon-production in glucose-limited chemostat culture. *Biotechnol. Bioeng.* 42: 1077–1085.
42. Robinson D, Memmert K (1991) Kinetics of recombinant immunoglobulins production by mammalian cells in continuous culture. *Biotechnol. Bioeng.* 38: 972–976.
43. Sinclair R (1974) Response of mammalian cells to controlled growth rates in steady-state continuous culture. *In Vitro* 10: 295–307.
44. Miller W, Blanch H, Wilke C (1988) A kinetic analysis of hybridoma growth and metabolism in batch and continuous suspension culture: Effect of nutrient concentration, dilution rate and pH. *Biotechnol. Bioeng.* 32: 947–965.
45. Linardos T, Kalogerakis N, Behie L (1992) Cell cycle model for growth rate and death rate in continuous suspension hybridoma cultures. *Biotechnol. Bioeng.* 40: 359–368.
46. Ray N, Karkare S, Runstadler P (1989) Cultivation of hybridoma cells in continuous culture: Kinetics of growth and product formation. *Biotechnol. Bioeng.* 33: 724–730.
47. Kou T, Fan L, Zhou Y, Ye Z, Liu X, et al. (2011) Detailed understanding of enhanced specific productivity in Chinese hamster ovary cells at low culture temperature. *J. Biosci. Bioeng.* 111: 365–369.
48. Nam J, Zhang F, Ermonval M, Linhardt R, Sharfstein S (2008) The effects of culture conditions on the glycosylation of secreted human placental alkaline phosphatase produced in Chinese hamster ovary cells. *Biotechnol. Bioeng.* 100: 1178–1193.
